# Supplementary material for: Structural Insights into the Effector – Immunity System Tse1/Tsi1 from Pseudomonas aeruginosa
Source: PubMed Central journal article supplement (PMC3391265; doi:10.1371/journal.pone.0040453), 2012-07-06
Supplement: pone.0040453.s001.pdf [file pone.0040453.s001.pdf]

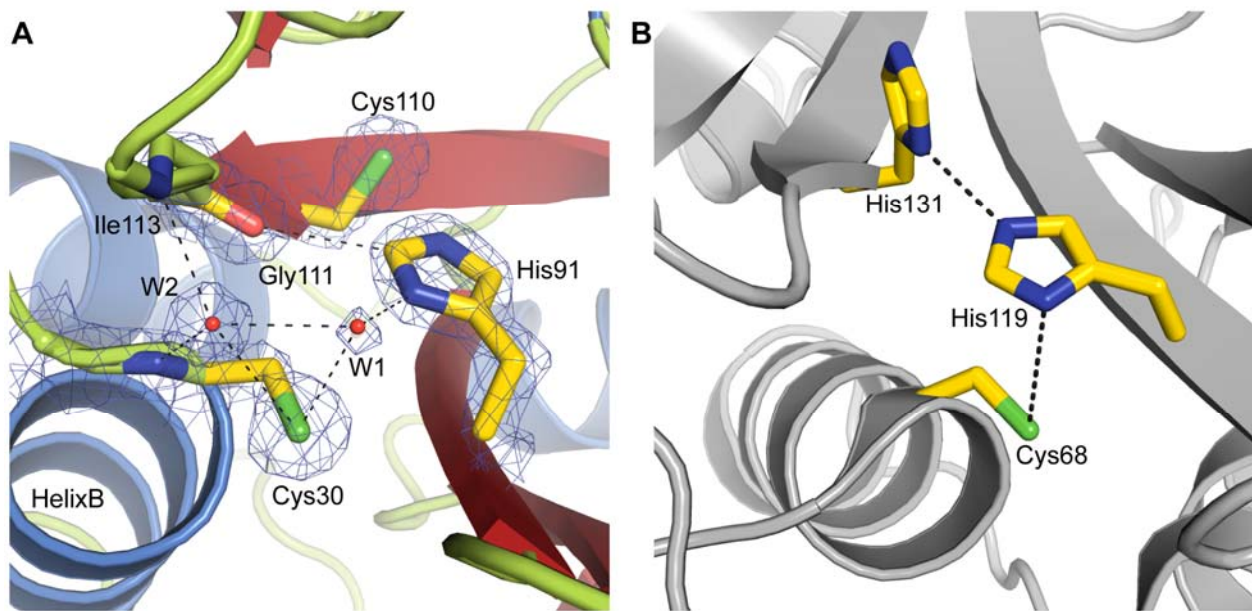

**FigureS1**
