# Supplementary material for: Structural Insights into the Effector – Immunity System Tse1/Tsi1 from Pseudomonas aeruginosa
Source: PubMed Central journal article supplement (PMC3391265; doi:10.1371/journal.pone.0040453), 2012-07-06
Supplement: pone.0040453.s002.pdf [file pone.0040453.s002.pdf]

**Table S1: Deviation for main chain atoms of Tse1 native<sup>a</sup> and Tse SeMet<sup>b</sup>.****Tse1 native**

|                    | chainD on chainA | chainD on chainB | chainD on chainC |
|--------------------|------------------|------------------|------------------|
| mean deviation (Å) | 0.212            | 0.156            | 0.213            |
| r.m.s.d. (Å)       | 0.326            | 0.214            | 0.333            |
| max. deviation (Å) | 2.985            | 2.617            | 2.553            |
| min. deviation (Å) | 0.009            | 0.011            | 0.014            |

**Tse1 SeMet**

|                    | chainD on chainA | chainD on chainB | chainD on chainC |
|--------------------|------------------|------------------|------------------|
| mean deviation (Å) | 0.210            | 0.223            | 0.165            |
| r.m.s.d. (Å)       | 0.243            | 0.256            | 0.221            |
| max. deviation (Å) | 1.470            | 1.010            | 1.947            |
| min. deviation (Å) | 0.027            | 0.033            | 0.016            |

<sup>a</sup> residues ranging from Ser3 to Leu150 were included in the superposition, except for chainD on chainB where residue Leu150 was excluded.

<sup>b</sup> residues ranging from Ser3 to Ser149 were included in the superposition.
