# Supplementary material for: Structural Insights into the Effector – Immunity System Tse1/Tsi1 from Pseudomonas aeruginosa
Source: PubMed Central journal article supplement (PMC3391265; doi:10.1371/journal.pone.0040453), 2012-07-06
Supplement: pone.0040453.s003.pdf [file pone.0040453.s003.pdf]

**Table S2: Tse1 / Tsi1 systems in different *Pseudomonas aeruginosa* strains.**

| <b><i>P. aeruginosa</i></b> | <b>Tse1 accession number</b> | <b>Tsi1 accession number</b> |
|-----------------------------|------------------------------|------------------------------|
| PAO1                        | NP_250535.1                  | NP_250536.1                  |
| 2192                        | ZP_04933560.1                | ZP_04933561.1                |
| PACS2                       | ZP_01365195.1                | ZP_01365196.1                |
| 39016                       | ZP_07796430.1                | ZP_07796431.1                |
| sp. 2_1_26                  | ZP_09053571.1                | ZP_09053570.1                |
| UCBPP-PA14                  | YP_791397.1                  | YP_791396.1                  |
| PAb1                        | ZP_06879238.1                | ZP_06879237.1                |
| PADK2_CF510                 | EIE44393.1                   | EIE44322.1                   |
| 138244                      | EGM22773.1                   | EGM22744.1                   |
| PA7                         | YP_001348808.1               | YP_001348807.1               |
