# Supplementary material for: Structural Insights into the Effector – Immunity System Tse1/Tsi1 from Pseudomonas aeruginosa
Source: PubMed Central journal article supplement (PMC3391265; doi:10.1371/journal.pone.0040453), 2012-07-06
Supplement: pone.0040453.s004.pdf [file pone.0040453.s004.pdf]

**Table S3: Primer for Tse1 and Tsi1 $\Delta$ N23 construct design.**

| <b>Primer</b>    | <b>Sequence</b>                           |
|------------------|-------------------------------------------|
| tse1_ndeI_f      | 5'-CGCAACATATGGACAGTCTCGATCAATGCATCGTC-3' |
| tse1_notI_r      | 5'-GCTGCGGCCGCACTGGCCCTGGGCAGGCTGCAAC-3'  |
| tsi1_dN23_ncoI_f | 5'-GCAACCATGGCTTTCACCCAGCTGGAAATCGTG-3'   |
| tsi1_mfeI_r      | 5'-GCTCAATTGTCATTTCTTTGCGGTCTGGCAGA-3'    |
